# Supplementary material for: Vaccination with immune complexes modulates the elicitation of functional antibodies against HIV-1
Source: PubMed Central journal article supplement (PMC10579950; doi:10.3389/fimmu.2023.1271686), 2023-10-03
Supplement: DataSheet_1.pdf [file DataSheet_1.pdf]

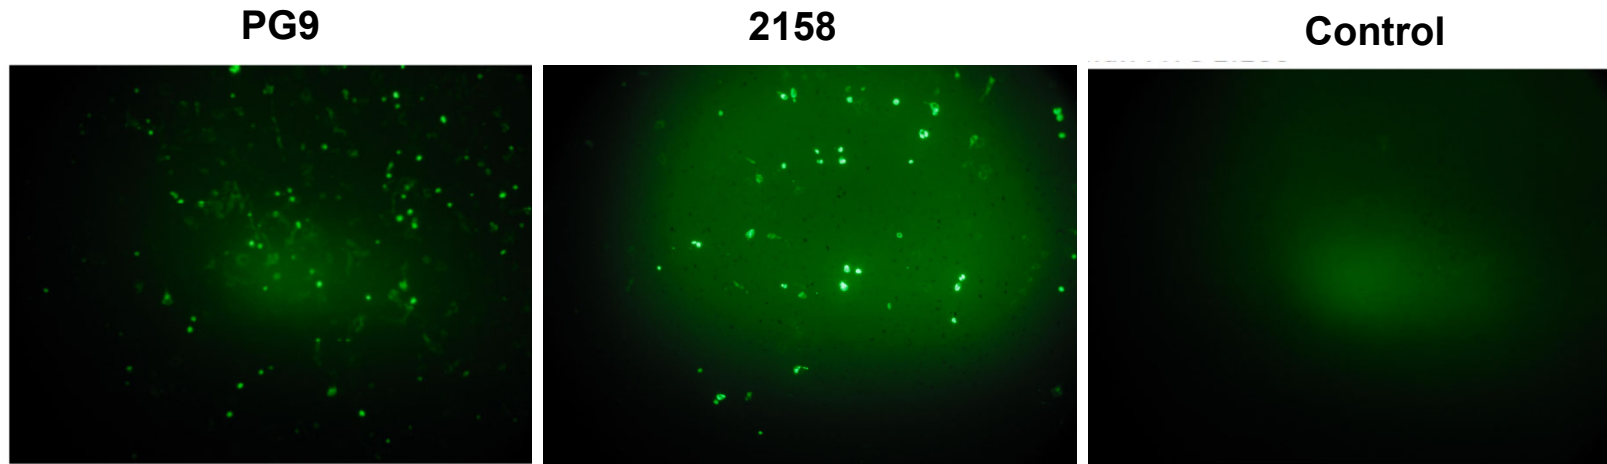

**Figure S1. Antigenicity profile of V1V2-2J9C.** A DNA plasmid 418H encoding A244 V1V2-2J9C was coated on 1  $\mu\text{m}$ -gold beads and transfected using a gene gun into COS-7 cells. Protein expression and antibody reactivity of V1V2-2J9C were evaluated using V2q mAb PG9 and V2i mAb 2158 (2  $\mu\text{g}/\text{ml}$  each), followed by FITC-labeled goat anti-human IgG. Untreated COS-7 cells stained with antibodies served as control.

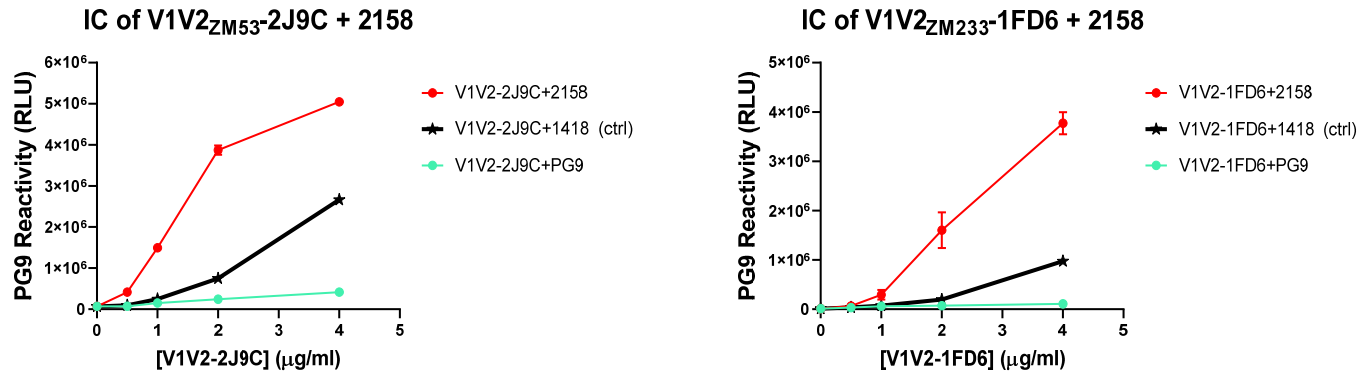

**Figure S2. Enhanced PG9 reactivity with different V1V2-scaffolds in complex with 2158.**

ZM53 V1V2-2J9C or ZM233 V1V2-1FD6 were pre-incubated with 2158, PG9, or 1418 (irrelevant control) at a 1:3 ratio. The antigen-mAb mixtures were diluted serially, coated onto wells, and reacted with biotinylated PG9, followed with AP-streptavidin and luminescent substrate.

| Epitope | mAb       | gp140 or gp120 |                |                   |              |                  |                    | V1V2V3        | V1V2-1FD6         |                   |                 | V1V2-2J9C      |                | V1V2-tags         |                  | Cyclic V2   |
|---------|-----------|----------------|----------------|-------------------|--------------|------------------|--------------------|---------------|-------------------|-------------------|-----------------|----------------|----------------|-------------------|------------------|-------------|
|         |           | AE.A244-UFOΔV3 | AE.A244-UFO-WT | AE.A244 D11 gp120 | C.1086 gp140 | C. 1086 D7 gp120 | M. Con-s D11 gp120 | C. CH505-1KNC | C.ZM233 V1V2-1FD6 | C.ZM109 V1V2-1FD6 | B.YU2 V1V2-1FD6 | V1V2/A244-2J9C | V1V2/ZM53-2J9C | AE.A244 V1V2.tags | C.1086 V1V2.tags | cV2/C.ZM109 |
| V2q     | PG9       | 2.26           | 2.26           | 0.36              | 0.22         | 0.12             | 0.34               | 2.76          | 1.87              | 2.63              | 2.36            | 3.14           | 2.44           | 0.26              | 0.35             | 0.23        |
| V2i     | 2158      | 4.34           | 4.33           | 2.35              | 2.18         | 2.15             | 1.88               | 0.30          | 4.38              | 4.51              | 4.60            | 4.55           | 4.48           | 2.14              | 1.72             | 0.20        |
| V2p     | CH58      | 4.51           | 4.46           | 2.44              | 2.27         | 2.39             | 2.08               | 0.24          | 0.18              | 0.31              | 0.27            | 4.52           | 4.03           | 2.42              | 2.40             | 0.11        |
|         | CH59      | 4.51           | 4.52           | 2.38              | 2.42         | 2.32             | 0.24               | 0.17          | 0.24              | 0.64              | 0.16            | 4.51           | 0.17           | 2.47              | 2.49             | 2.37        |
|         | CAP228.3D | 4.48           | 4.57           | 2.41              | 2.36         | 2.42             | 2.06               | 0.18          | 0.20              | 0.21              | 0.27            | 4.48           | 4.49           | 2.48              | 2.44             | 0.12        |
|         | CAP228.16 | 4.50           | 4.53           | 2.10              | 2.39         | 2.23             | 2.06               | 0.17          | 0.20              | 0.19              | 0.43            | 4.39           | 4.49           | 2.48              | 2.45             | 0.07        |
| V3      | 2558      | 0.18           | 4.56           | 2.29              | 2.45         | 2.41             | 2.09               | 3.06          | 0.25              | 0.20              | 0.19            | 0.20           | 0.18           | 0.09              | 0.13             | 0.07        |
|         | 447       | 0.23           | 0.43           | 0.40              | 2.42         | 2.22             | 1.96               | 0.69          | 0.46              | 0.28              | 0.42            | 0.24           | 0.22           | 0.10              | 0.29             | 0.09        |
| C5      | 670       | 0.21           | 0.31           | 0.66              | 0.51         | 0.32             | 2.21               | 0.24          | 0.23              | 0.30              | 0.20            | 0.22           | 0.27           | 0.35              | 0.24             | 0.32        |
| Ctrl    | 860       | 0.14           | 0.14           | 0.12              | 0.08         | 0.08             | 0.11               | 0.15          | 0.16              | 0.17              | 0.15            | 0.14           | 0.15           | 0.09              | 0.09             | 0.16        |
|         | PBS       | 0.12           | 0.13           | 0.12              | 0.07         | 0.06             | 0.14               | 0.12          | 0.12              | 0.13              | 0.13            | 0.13           | 0.12           | 0.06              | 0.07             | 0.07        |

**Figure S3. Recognition of 15 antigens by anti-Env mAbs with defined epitope specificities.**

ELISA was performed to test antigen reactivity with mAbs specific for three distinct V1V2 epitopes (V2q or V2 apex, V2i, and V2p), the V3 crown epitopes, the C terminus (C5) of gp120, and an irrelevant parvovirus antigen (860). Based on the OD values above control, the presence of V2q, V2i, and/or V2p epitopes in each of the 15 antigens is denoted in Figures 4A and 4B.

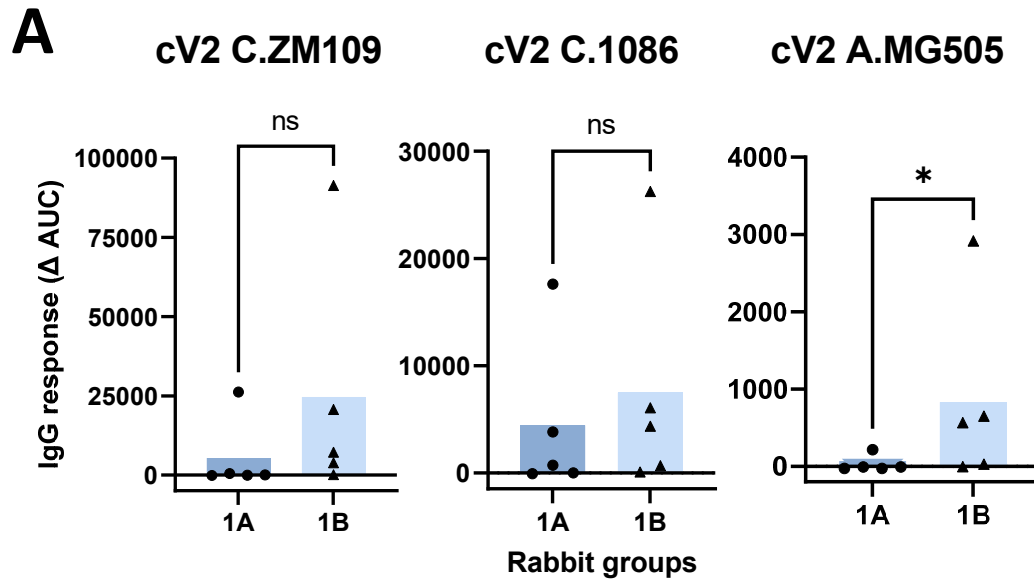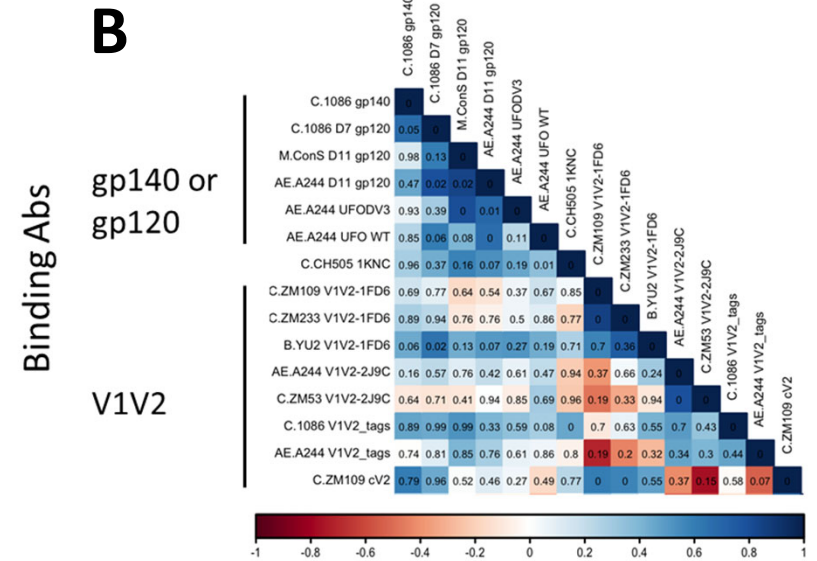

**Figure S4.**

**A. Comparison of Ab responses to cyclic V2 (cV2) peptides elicited in Groups 1A vs 1B.**

Beads coated with each cV2 peptide were reacted with serially diluted sera after the last vaccination dose. AUCs were subtracted with pre-bleed AUCs to yield  $\Delta$ AUC values. \*,  $p < 0.05$ ; ns,  $p > 0.05$  by Mann Whitney test.

**B. Correlation of IgG binding data from the multiplex bead assays for Groups 1A and 1B.** Multiple bead assay data were from Figure 4.

Correlation analysis was performed using the Spearman test. Correlation coefficients are color coded according to the red (-1)-to-blue (+1) scale, while p values were presented in each box.

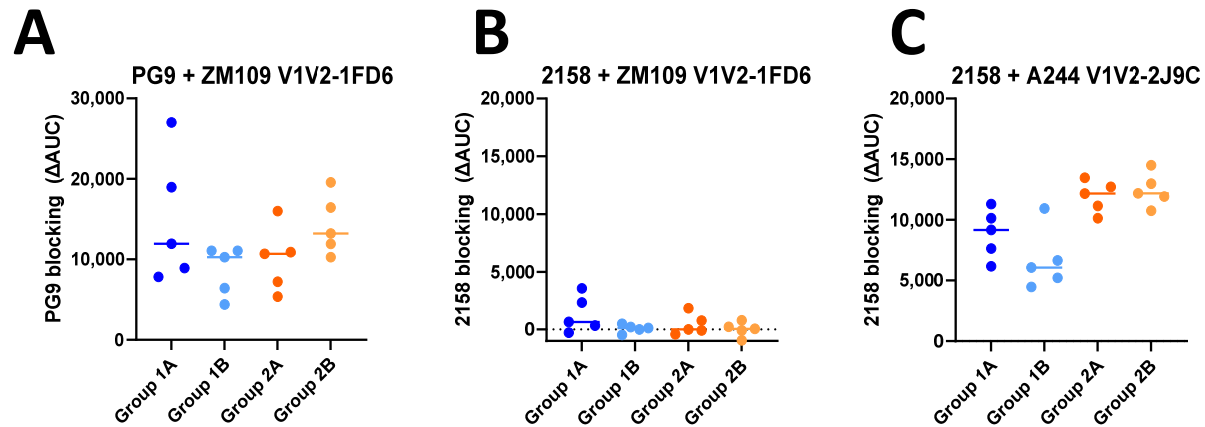

**Figure S5. Elicitation of Abs capable of blocking PG9 and 2158 in the four rabbit groups.**

Beads coated with C.ZM109 V1V2-1FD6 or A244 V1V2-2J9C (both bearing V2q and V2i epitopes) were treated with serially diluted immune sera collected after the final vaccination or pre-bleed serum pool. Biotinylated PG9 or 2158 mAbs were subsequently added, and the reduced binding of the respective mAbs by immune sera was presented as  $\Delta$ AUC (AUC of prebleed sera - AUC of immune sera).

A. Relative levels of PG9-blocking Abs in immune sera binding to ZM109 V1V2-1FD6.

B. Lack of 2158-blocking Abs in immune sera when tested with ZM109 V1V2-1FD6.

C. Relative levels of 2158-blocking Abs in immune sera when tested with A244 V1V2-2J9C.

| mAb        | Epitope                | TH023.6      | TH023.6 N160K |
|------------|------------------------|--------------|---------------|
|            |                        | IC50 (µg/ml) |               |
| PG9        | V2 apex                | <b>0.11</b>  | <b>&gt;5</b>  |
| PG16       | (aka V2 glycan or V2q) | <b>3.13</b>  | <b>&gt;5</b>  |
| PGDM1400   |                        | <b>0.007</b> | <b>&gt;5</b>  |
| CH01       |                        | >25          | >25           |
| PGT128     | V3-glycan              | >5           | <b>0.09</b>   |
| PGT121     |                        | >5           | >5            |
| 10-1074    |                        | >25          | >25           |
| sCD4       | CD4bs                  | <b>0.87</b>  | <b>0.62</b>   |
| b12        |                        | >25          | >25           |
| N6         |                        | <b>0.01</b>  | <b>0.05</b>   |
| VRC01      |                        | <b>1.09</b>  | <b>0.24</b>   |
| 3BNC117    |                        | <b>0.05</b>  | <b>0.06</b>   |
| CH31       |                        | <b>0.2</b>   | <b>0.36</b>   |
| DH235_4A   |                        | <b>1.61</b>  | <b>1.37</b>   |
| CH103      |                        | >25          | >25           |
| PGT151     | gp120/gp41             | >10          | >5            |
| VRC34.01   |                        | >25          | >5            |
| 2G12       | Glycan                 | >25          | >25           |
| DH511.2_K3 | MPER                   | <b>0.012</b> | <b>0.011</b>  |
| 2F5        |                        | <0.01        | <0.01         |
| 4E10       |                        | <0.01        | <b>0.03</b>   |
| 697-30D    | V2i                    | >25          | >25           |
| 3074       | V3 crown               | <b>0.03</b>  | <b>1.87</b>   |
| 447-52D    |                        | >25          | >25           |

**Figure S6. N160K abrogated TH023.6 neutralization by V2-apex mAbs without affecting the other mAbs.**
